# Supplementary material for: Quantification of the impact of cooking processes on indoor concentrations of volatile organic species and primary and secondary organic aerosols
Source: PubMed Central journal article supplement — Indoor Air. 2019 Sep 17;29(6):926–42. doi: 10.1111/ina.12597 (PMC6856830; doi:10.1111/ina.12597), 2019-09-17
Supplement: INA-29-926-s001.pdf [file INA-29-926-s001.pdf]

Supplementary information: Quantification of the  
impact of cooking processes on indoor  
concentrations of volatile organic species and  
primary and secondary organic aerosols

Felix Klein <sup>\*1</sup>, Urs Baltensperger<sup>1</sup>, André S.H. Prévôt<sup>1</sup>, and Imad  
El Haddad <sup>†1</sup>

<sup>1</sup>Laboratory of Atmospheric Chemistry, Paul Scherrer Institute,  
Villigen, 5232, Switzerland

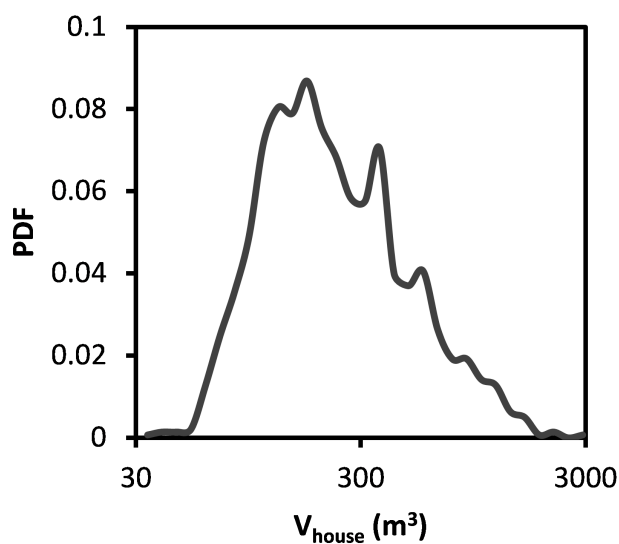

Figure S.1: House volume variation in the model. Different peaks correspond to successive room additions to the house.

---

<sup>\*</sup>now at: Meteorologisches Observatorium Hohenpeissenberg, Deutscher Wetterdienst (DWD), Hohenpeissenberg, 82383, Germany

<sup>†</sup>imad.el-haddad@psi.ch

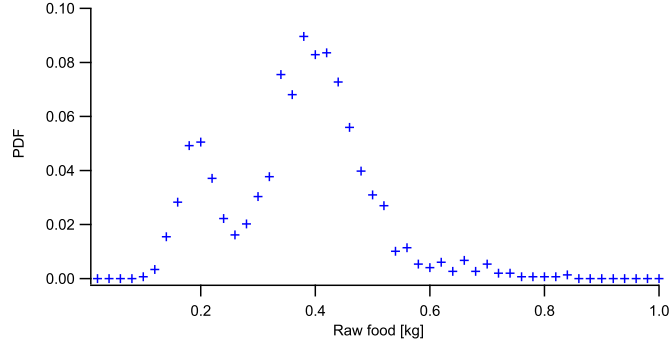

Figure S.2: Probability density function of amount of raw food cooked.

Table S.1: Variance-covariance matrix of the lognormal adsorption rates and coefficients used as input to generate multivariate normal distributions for these parameters.

|                 |      | $\log(K_{e,i})$ |      |      |      |      | $\log(k_{a,i})$ |      |      |      |      |
|-----------------|------|-----------------|------|------|------|------|-----------------|------|------|------|------|
|                 |      | ACR             | C1   | C2   | C3   | Terp | ACR             | C1   | C2   | C3   | Terp |
| $\log(K_{e,i})$ | ACR  | 0.88            | 0.89 | 0.85 | 0.86 | 0.87 | 0.22            | 0.22 | 0.21 | 0.21 | 0.22 |
|                 | C1   | 0.89            | 0.93 | 0.86 | 0.86 | 0.87 | 0.22            | 0.23 | 0.21 | 0.21 | 0.22 |
|                 | C2   | 0.85            | 0.86 | 0.89 | 0.83 | 0.84 | 0.21            | 0.21 | 0.22 | 0.21 | 0.21 |
|                 | C3   | 0.86            | 0.86 | 0.83 | 0.93 | 0.85 | 0.21            | 0.21 | 0.21 | 0.23 | 0.21 |
|                 | Terp | 0.87            | 0.87 | 0.84 | 0.85 | 0.91 | 0.22            | 0.22 | 0.21 | 0.21 | 0.23 |
| $\log(k_{a,i})$ | ACR  | 0.22            | 0.22 | 0.21 | 0.21 | 0.22 | 0.31            | 0.31 | 0.31 | 0.31 | 0.31 |
|                 | C1   | 0.22            | 0.23 | 0.21 | 0.21 | 0.22 | 0.31            | 0.31 | 0.31 | 0.31 | 0.31 |
|                 | C2   | 0.21            | 0.21 | 0.22 | 0.21 | 0.21 | 0.31            | 0.31 | 0.31 | 0.3  | 0.3  |
|                 | C3   | 0.21            | 0.21 | 0.21 | 0.23 | 0.21 | 0.31            | 0.31 | 0.3  | 0.31 | 0.3  |
|                 | Terp | 0.22            | 0.22 | 0.21 | 0.21 | 0.23 | 0.31            | 0.31 | 0.3  | 0.3  | 0.31 |
