# Supplementary figures and images for: Quantification of the impact of cooking processes on indoor concentrations of volatile organic species and primary and secondary organic aerosols
Source: PubMed Central journal article supplement — Indoor Air. 2019 Sep 17;29(6):926–42. doi: 10.1111/ina.12597 (PMC6856830; doi:10.1111/ina.12597), 2019-09-17

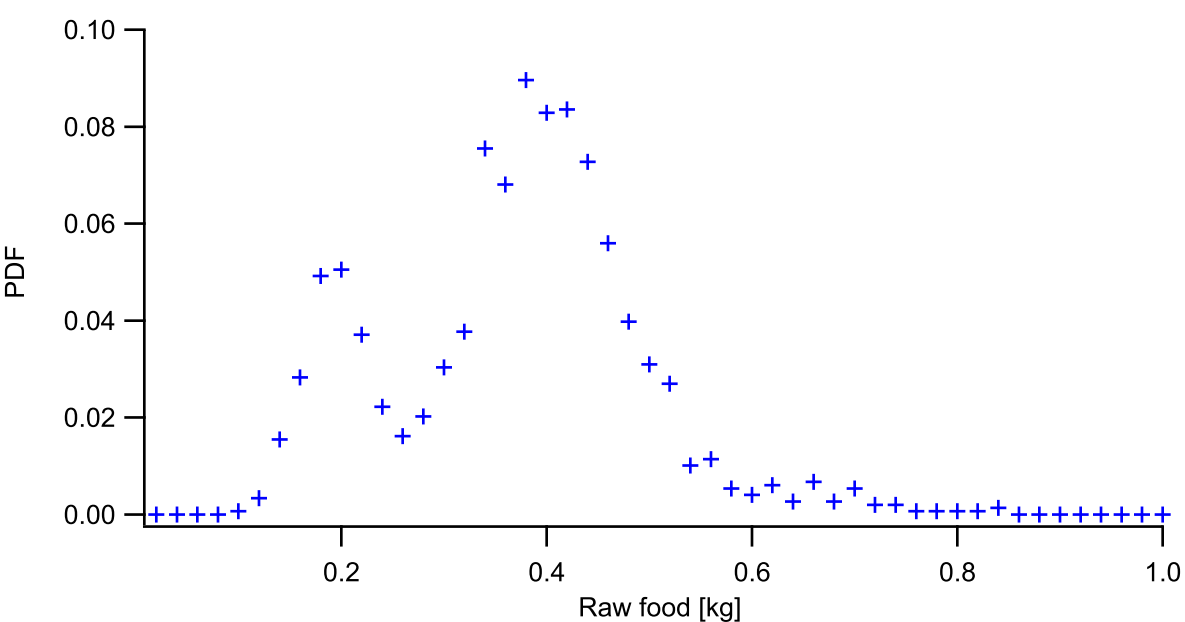

Supplement: INA-29-926-s003.pdf [file INA-29-926-s003.pdf]
